# Supplementary material for: Soft BiOBr@TiO2 nanofibrous membranes with hierarchical heterostructures as efficient and recyclable visible-light photocatalysts
Source: Royal Society of Chemistry journal article supplement (doi:10.1039/c8en00866c), 2018-01-01
Supplement: c8en00866c1.pdf [file c8en00866c1.pdf]

## Supporting information for

### **Soft BiOBr@TiO<sub>2</sub> nanofibrous membranes with hierarchical heterostructures as efficient and recyclable visible-light photocatalysts†**

Yuting Cai,<sup>‡ab</sup> Jun Song,<sup>‡ab</sup> Xiaoyan Liu,<sup>\*a</sup> Xia Yin,<sup>ab</sup> Xiaoran Li,<sup>ab</sup> Jianyong Yu<sup>ab</sup> and Bin Ding<sup>\*ab</sup>

<sup>a</sup>State Key Laboratory for Modification of Chemical Fibers and Polymer Materials, College of Textiles, Donghua University, Shanghai 201620, China

<sup>b</sup>Innovation Center for Textile Science and Technology, Donghua University, Shanghai 200051, China

<sup>‡</sup> These authors contributed equally to this work.

### Calculation of fractal dimension

The fractal dimension ( $D$ ) was calculated from the corresponding  $N_2$  adsorption isotherms based on the modified FHH equation:<sup>1,2</sup>

$$\ln(V / V_{mono}) = A[\ln(\ln(P_0 / P))] + \text{constant}$$

Where  $V$  is the  $N_2$  adsorption capacity at equilibrium pressure;  $V_{mono}$  is the monolayer adsorption capacity;  $P_0$  and  $P$  are the saturation and equilibrium pressure, respectively; plots of  $\ln(V/V_{mono})$  versus  $\ln(\ln(P_0/P))$  showing a linear trend were reconstructed, and the slop  $A$  could be used to calculate  $D$  by utilizing the expression:  $D = A + 3$ , which was according to the dominant forces of liquid-gas surface tension at high coverage.

### Calculation of band edge positions

The band edge positions of the semiconductor were calculated by the atom's Mulliken electronegativity equation:<sup>3-5</sup>

$$E_{VB} = X - E^e + 0.5E_g$$

Where  $E_{VB}$  is the valence band edge potential;  $X$  is the absolute electronegativity of the semiconductor (5.6 eV for  $TiO_2$  and 6.17 eV for  $BiOBr$ );  $E^e$  is the energy of free electrons on the hydrogen scale (about 4.5 eV);  $E_g$  is the corresponding energy band gap; The conduction band potential can be deduced by  $E_{CB} = E_{VB} - E_g$ .

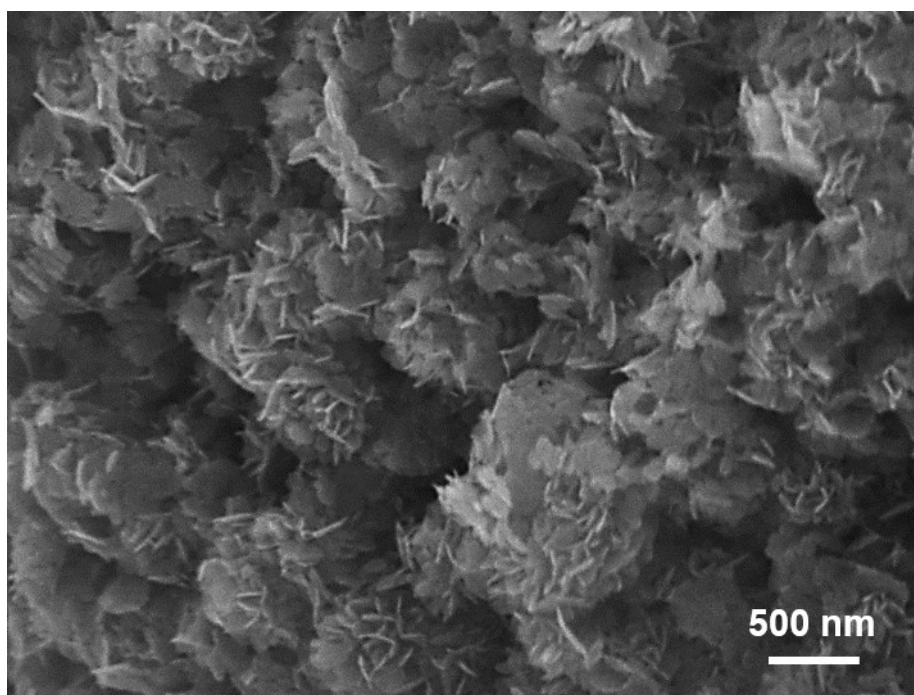

**Fig. S1** SEM image of the synthesized pure BiOBr powder.

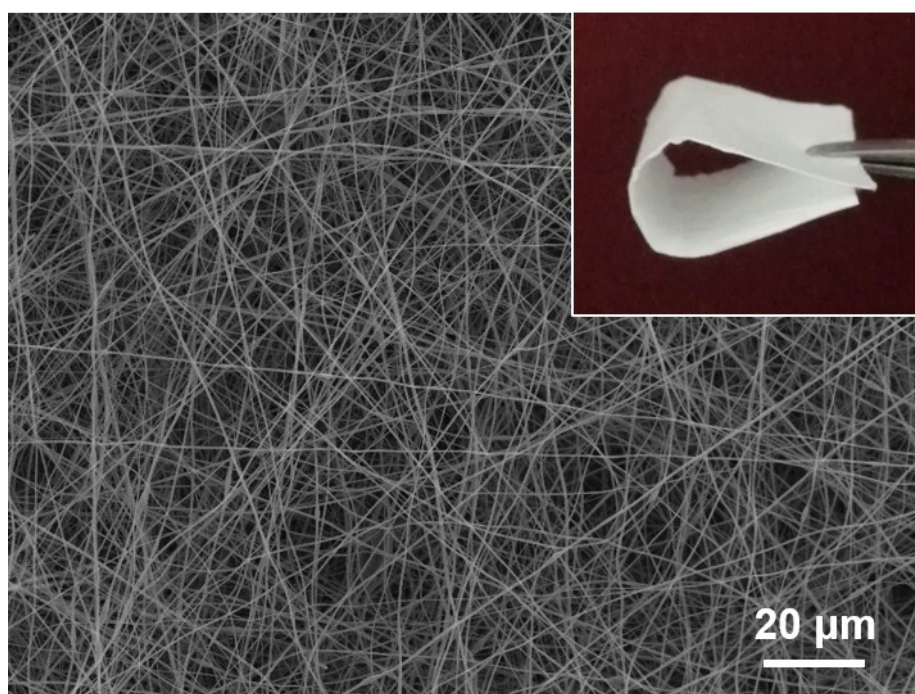

**Fig. S2** SEM image of TiO<sub>2</sub> NFM with Y<sup>3+</sup> doping. The inset shows the softness of the membrane.

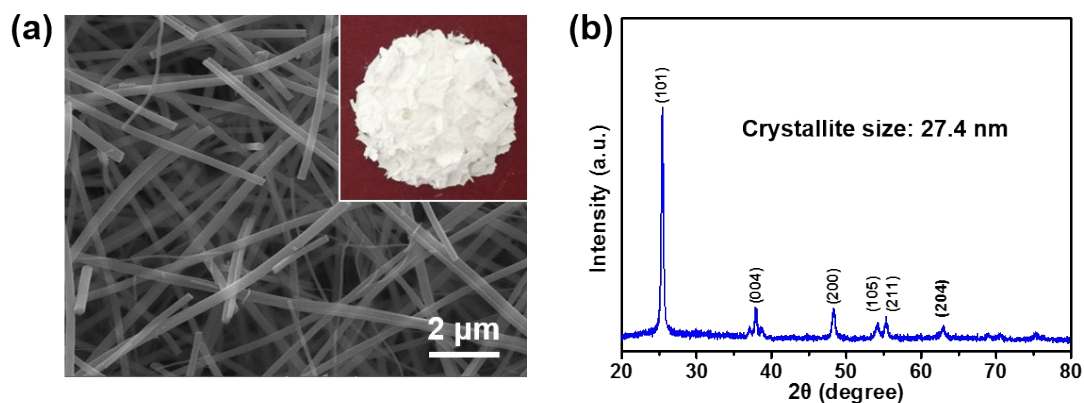

**Fig. S3** (a) SEM image of pure  $\text{TiO}_2$  NFM without  $\text{Y}^{3+}$  doping and (b) the corresponding XRD pattern. The inset in (a) shows the fragility of the membrane.

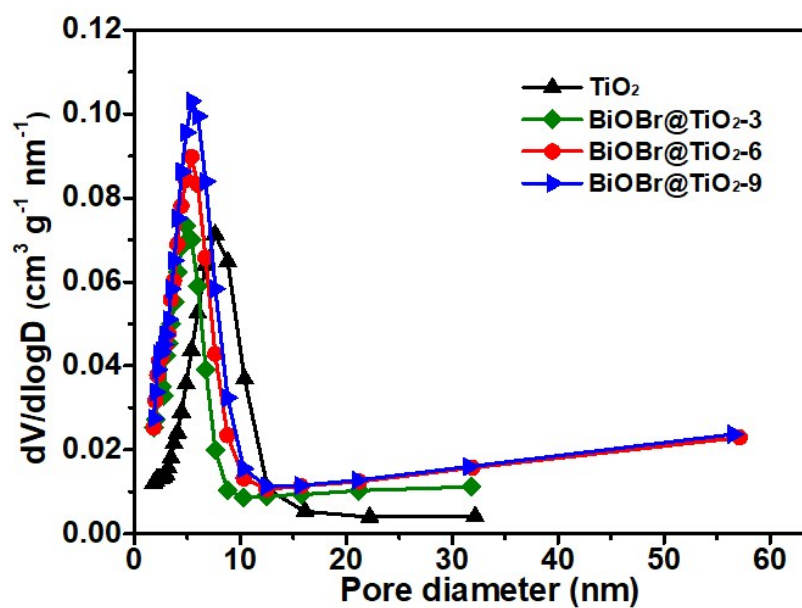

**Fig. S4** Pore size distribution curves of the relevant nanofibrous membranes using the BJH method.

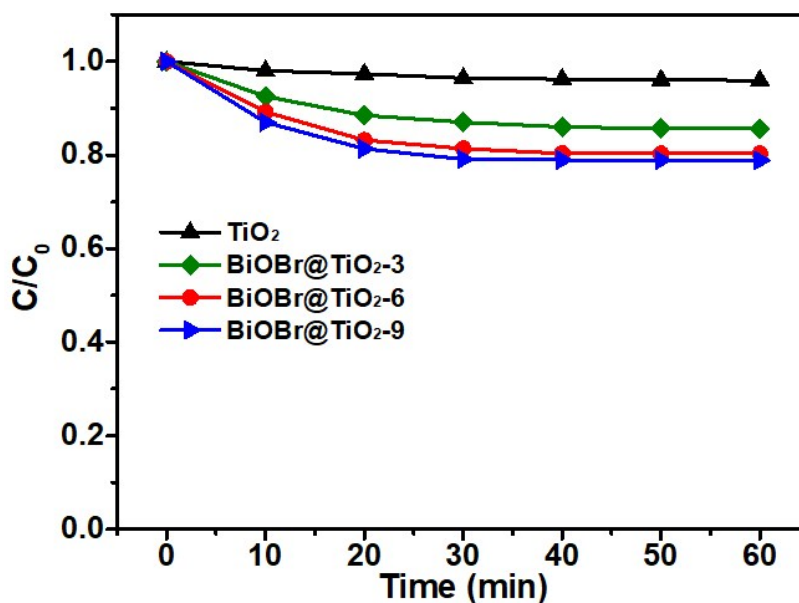

**Fig. S5** Adsorption performance of various nanofibers towards RhB in the dark.

## References

- 1 B. Yao, Y. Zhang, H. Shi and L. Zhang, Fractal analysis of porous polycrystalline titania by adsorption, *Chem. Mater.*, 2000, **12**, 3740-3744.
- 2 M. J. Watt-Smith, K. J. Edler and S. P. Rigby, An experimental study of gas adsorption on fractal surfaces, *Langmuir*, 2005, **21**, 2281-2292.
- 3 J. Yu and J. Ran, Facile preparation and enhanced photocatalytic H<sub>2</sub>-production activity of Cu(OH)<sub>2</sub> cluster modified TiO<sub>2</sub>, *Energy Environ. Sci.*, 2011, **4**, 1364-1371.
- 4 L. Kong, Z. Jiang, H. H. Lai, R. J. Nicholls, T. Xiao, M. O. Jones and P. P. Edwards, Unusual reactivity of visible-light-responsive AgBr-BiOBr heterojunction photocatalysts, *J. Catal.*, 2012, **293**, 116-125.
- 5 X. Xiong, L. Ding, Q. Wang, Y. Li, Q. Jiang and J. Hu, Synthesis and photocatalytic activity of BiOBr nanosheets with tunable exposed {010} facets, *Appl. Catal., B*, 2016, **188**, 283-291.
